# Supplementary material for: Efficiency of ClearCorrect Clear Aligners in Achieving Anterior Tooth Movements
Source: Research Square preprint supplement (doi:10.21203/rs.3.rs-8676074/v1), 2026-02-11
Supplement: Supplementary file 1 [file 54559a58ff6ff0dbf4029ea0.docx]

**Table 2.** Accuracy of achieved and planned maxillary tooth movements

| Tooth type | Movement | n (Teeth) | Achieved  (Mean ± SD) | Planned  (Mean ± SD) | Accuracy (%) | p |
| --- | --- | --- | --- | --- | --- | --- |
| Central incisor | **Intrusion (mm)** | 16 | 0.25 ± 0.24 | 0.43 ± 0.53 | 58.0 | 0.417 |
| **Extrusion (mm)** | 12 | 0.26 ± 0.26 | 0.55 ± 0.57 | 47.27 | 0.099 |
| **B/L translation (mm)** | 28 | 0.46 ± 0.35 | 0.58 ± 0.43 | 79.31 | 0.317 |
| **M/D translation (mm)** | 28 | 0.32 ± 0.26 | 0.42 ± 0.30 | 76.19 | 0.579 |
| **Crown angulation (°)** | 28 | 3.19 ± 2.62 | 3.84 ± 2.76 | 83.07 | 0.245 |
| **Crown inclination (°)** | 28 | 3.52 ± 2.97 | 5.77 ± 4.60 | 61.0 | 0.080 |
| **Rotation (°)** | 28 | 7.74 ± 5.42 | 11.03 ± 8.22 | 70.17 | 0.122 |
| Lateral incisor | **Intrusion (mm)** | 14 | 0.18 ± 0.13 | 0.32 ± 0.26 | 56.25 | 0.232 |
| **Extrusion (mm)** | 13 | 0.38 ± 0.39 | 0.69 ± 0.81 | 55.07 | 0.238 |
| **B/L translation (mm)** | 28 | 0.59 ± 0.52 | 0.79 ± 0.69 | 74.68 | 0.245 |
| **M/D translation (mm)** | 28 | 0.39 ± 0.23 | 0.70 ± 0.49 | 55.71 | ****0.005** |
| **Crown angulation (°)** | 27 | 3.07 ± 3.02 | 3.41 ± 3.38 | 90.02 | 0.829 |
| **Crown inclination (°)** | 28 | 3.84 ± 3.07 | 5.54 ± 4.61 | 69.31 | 0.232 |
| **Rotation (°)** | 28 | 7.86 ± 5.89 | 11.28 ± 8.59 | 69.68 | 0.142 |
| Canine | **Intrusion (mm)** | 12 | 0.39 ± 0.47 | 0.49 ± 0.55 | 79.59 | 0.583 |
| **Extrusion (mm)** | 16 | 0.47 ± 0.45 | 0.72 ± 0.63 | 62.27 | 0.235 |
| **B/L translation (mm)** | 28 | 0.65 ± 0.50 | 0.78 ± 0.58 | 83.33 | 0.390 |
| **M/D translation (mm)** | 28 | 0.43 ± 0.35 | 0.52 ± 0.39 | 82.69 | 0.354 |
| **Crown angulation (°)** | 28 | 2.35 ± 2.75 | 2.76 ± 3.19 | 85.14 | 0.658 |
| **Crown inclination (°)** | 27 | 2.49 ± 1.95 | 3.59 ± 2.99 | 69.35 | 0.287 |
| **Rotation (°)** | 28 | 5.55 ± 4.75 | 7.85 ± 7.16 | 70.70 | 0.265 |

SD: Standard deviation, Min: minimum, Max: maximum.

**Mann–Whitney U test was performed; *p < 0.05; ** p < 0.01; *** p < 0.001.
B/L:**buccolingual;**M/D:**mesiodistal.
