# Supplementary material for: Efficiency of ClearCorrect Clear Aligners in Achieving Anterior Tooth Movements
Source: Research Square preprint supplement (doi:10.21203/rs.3.rs-8676074/v1), 2026-02-11
Supplement: Supplementary file 2 [file d701353bbae1ab308fce9ae9.docx]

**Table 1.** Demographic and clinical characteristics of the study sample

|  | Gender | Sample size (n) | Mean±SD | Min. | Max. | *p* |
| --- | --- | --- | --- | --- | --- | --- |
| Mean age (year) | **Female** | 11 | 21.08±6.81 | 15.58 | 38.83 | **0.515** |
| **Male** | 9 | 23.48±9.24 | 16.0 | 38.08 |
| **Total** | 20 | 22.17±7.86 | 15.58 | 38.83 |  |
| Little’s irregularity index (mm) | **Female** | 11 | 5.01±0,55 | 4.1 | 5.9 | **0.556** |
| **Male** | 9 | 4.94±0.66 | 4.0 | 5.9 |
| **Total** | 20 | 4.97±0.60 | 4.0 | 5.9 |  |
| Number of aligners used | **Female** | 11 | 21.36±3.64 | 18 | 28 | **0.213** |
| **Male** | 9 | 19.55±2.29 | 17 | 24 |
| **Total** | 20 | 20.55±3.17 | 17 | 28 |  |

SD: Standard deviation, Min: minimum, Max: maximum.

* Independent samples t-test was performed, ***p*** <0.05.
