# Supplementary material for: Efficiency of ClearCorrect Clear Aligners in Achieving Anterior Tooth Movements
Source: Research Square preprint supplement (doi:10.21203/rs.3.rs-8676074/v1), 2026-02-11
Supplement: Supplementary file 3 [file e10325466b388cbea937475b.docx]

**Table 3.** Accuracy of achieved and planned mandibular tooth movements

| Tooth type | Movement | n  (Teeth) | Achieved  (Mean ± SD) | Planned  (Mean ± SD) | Accuracy (%) | p |
| --- | --- | --- | --- | --- | --- | --- |
| Mandibular incisors (Central+lateral) | **Intrusion (mm)** | 43 | 0.42 ± 0.33 | 0.75 ± 0.52 | 56.00 | ****0.002** |
| **Extrusion (mm)** | 28 | 0.20 ± 0.16 | 0.32 ± 0.26 | 62.50 | 0.053 |
| **B/L translation (mm)** | 56 | 0.77 ± 0.67 | 0.98 ± 0.80 | 78.57 | 0.169 |
| **M/D translation (mm)** | 56 | 0.48 ± 0.56 | 0.61 ± 0.67 | 78.68 | 0.185 |
| **Crown angulation (°)** | 56 | 2.02 ± 2.03 | 2.46 ± 2.63 | 82.11 | 0.791 |
| **Crown inclination (°)** | 56 | 3.26 ± 3.60 | 4.82 ± 5.42 | 67.63 | 0.127 |
| **Rotation (°)** | 56 | 6.88 ± 5.88 | 9.15 ± 8.34 | 75.19 | 0.204 |
| Canine | **Intrusion (mm)** | 18 | 0.48 ± 0.37 | 0.63 ± 0.57 | 76.19 | 0.402 |
| **Extrusion (mm)** | 18 | 0.23 ± 0.17 | 0.34 ± 0.23 | 67.64 | 0.374 |
| **B/L translation (mm)** | 28 | 0.58 ± 0.64 | 0.73 ± 0.68 | 79.45 | 0.302 |
| **M/D translation (mm)** | 28 | 0.38 ± 0.39 | 0.51 ± 0.53 | 74.50 | 0.306 |
| **Crown angulation (°)** | 27 | 2.58 ± 2.50 | 3.22 ± 4.45 | 80.12 | 0.829 |
| **Crown inclination (°)** | 25 | 3.09 ± 2.58 | 4.81 ± 4.44 | 64.24 | 0.260 |
| **Rotation (°)** | 28 | 10.36 ± 7.02 | 14.96 ± 9.25 | 69.25 | 0.051 |

SD: Standard deviation, Min: minimum, Max: maximum.

**Mann–Whitney U test was performed; *p < 0.05; ** p < 0.01; *** p < 0.001.
B/L:**buccolingual;**M/D:**mesiodistal.
